# Supplementary material for: Framework for the impact analysis and implementation of Clinical Prediction Rules (CPRs)
Source: Springer Nature journal article supplement (doi:10.1186/1472-6947-11-62), 2011-10-14
Supplement: 12911_2011_441_MOESM1_ESM.pdf [file 12911_2011_441_MOESM1_ESM.pdf]

| Symptom                                                                         | Score |
|---------------------------------------------------------------------------------|-------|
| Active cancer (treatment ongoing or within previous 6 months or palliative)     | 1     |
| Paralysis, paresis or recent plaster immobilization of the lower extremities    | 1     |
| Recently bedridden > 3 days or major surgery within 4 weeks                     | 1     |
| Localized tenderness along the distribution of the deep venous system           | 1     |
| Entire leg swollen                                                              | 1     |
| Calf swelling 3 cm > asymptomatic side (measured 10 cm below tibial tuberosity) | 1     |
| Pitting oedema confined to the symptomatic leg                                  | 1     |
| Collateral superficial veins (non-varicose)                                     | 1     |
| Alternative diagnosis as likely or greater than that of DVT                     | 2     |

Risk score interpretation (probability of DVT):

- $\geq 3$  points: high risk (75%);
- 1 to 2 points: moderate risk (17%);
- $< 1$  point: low risk (3%).

Wells PS, Anderson DR, Bormanis J, Guy F, Mitchell M, Gray L, Clement C, Robinson KS, Lewandowski B. Value of assessment of pretest probability of deep-vein thrombosis in clinical management. *Lancet* 1997;**350** :1795-8
