# Supplementary material for: Framework for the impact analysis and implementation of Clinical Prediction Rules (CPRs)
Source: Springer Nature journal article supplement (doi:10.1186/1472-6947-11-62), 2011-10-14
Supplement: 12911_2011_441_MOESM2_ESM.pdf [file 12911_2011_441_MOESM2_ESM.pdf]

Any of the following signs and symptoms:

1. Tonsillar exudate
2. Tender cervical anterior adenopathy
3. History of fever (or  $>38.0^{\circ}\text{C}$ )
4. Absence of cough

Score

0 - 1

2 - 3

4

Probability of  
GABHS

Low

Intermediate

High

ACP/ASIM  
guidelines

No treatment

Further testing  
Rapid antigen  
detection test (RADT)

Empirical treatment  
with antibiotics

Centor RM, Witherspoon JM, Dalton HP, Brody CE, Link K. The diagnosis of strep throat in adults in the emergency room. *Med Decis Making*. 1981;1(3):239-246.
