# Supplementary material for: Framework for the impact analysis and implementation of Clinical Prediction Rules (CPRs)
Source: Springer Nature journal article supplement (doi:10.1186/1472-6947-11-62), 2011-10-14

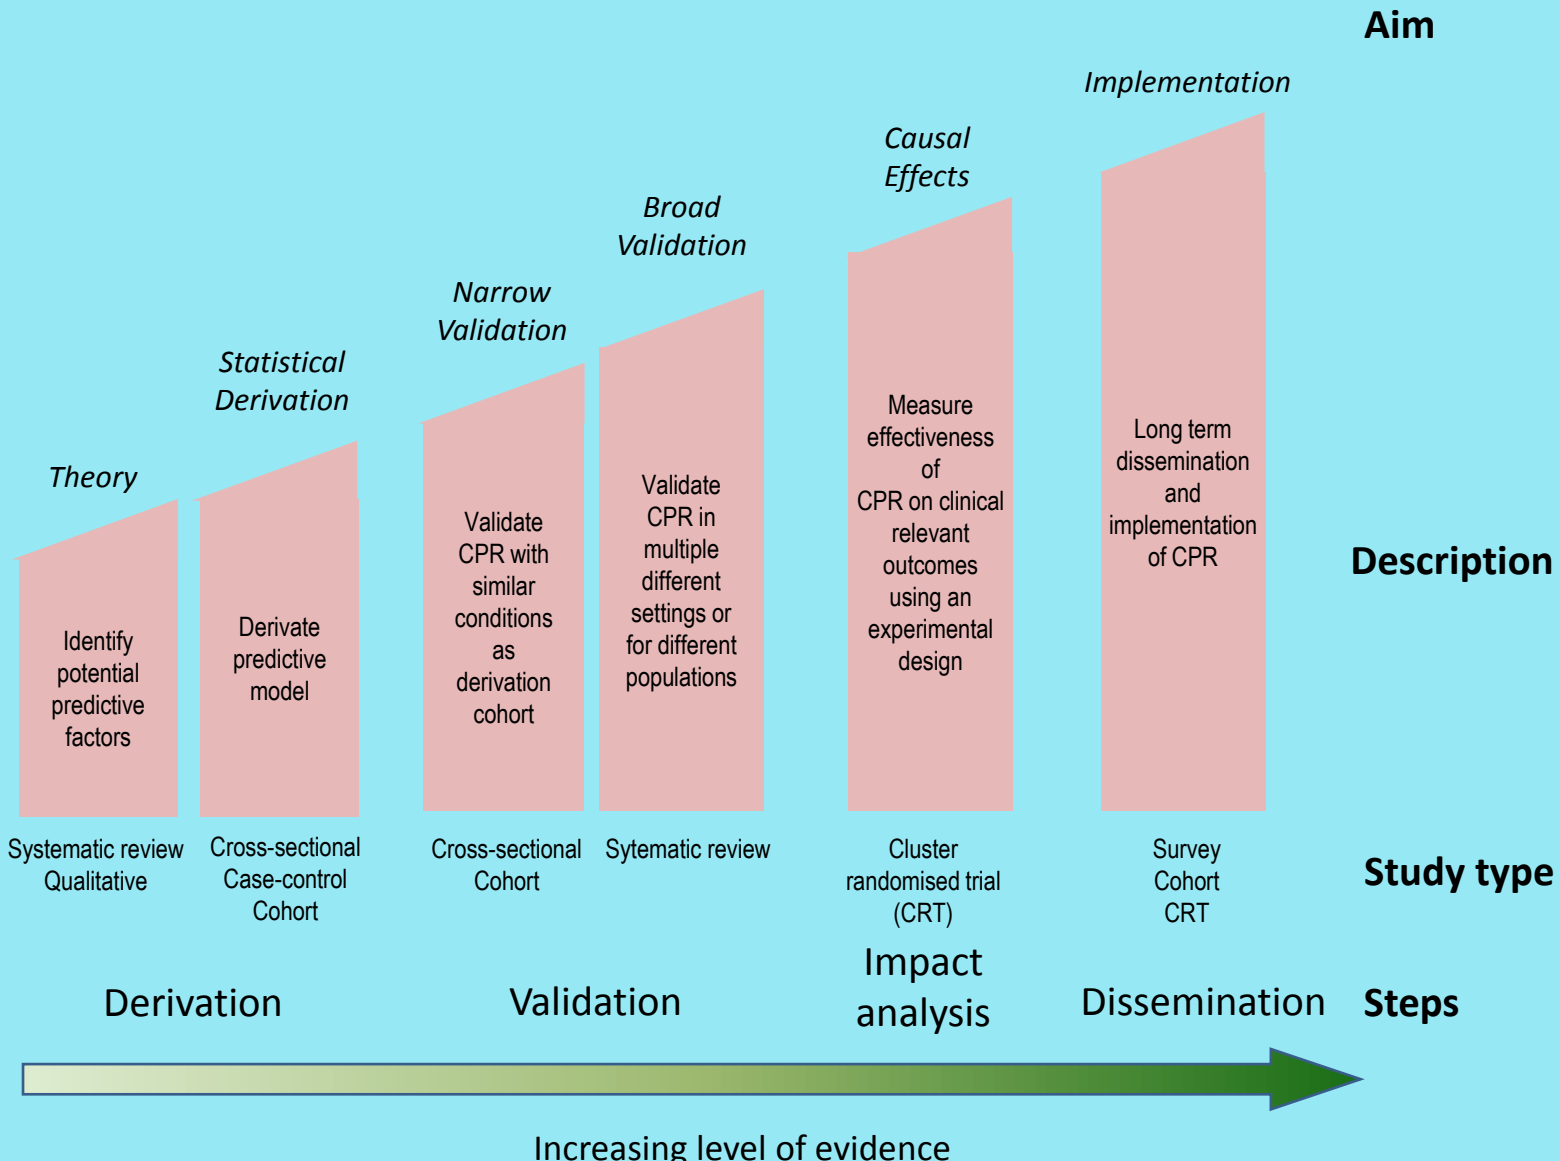

Supplement: 12911_2011_441_MOESM3_ESM.pdf [file 12911_2011_441_MOESM3_ESM.pdf]
